# Supplementary material
Source: PubMed Central journal article supplement (PMC5844703)

A

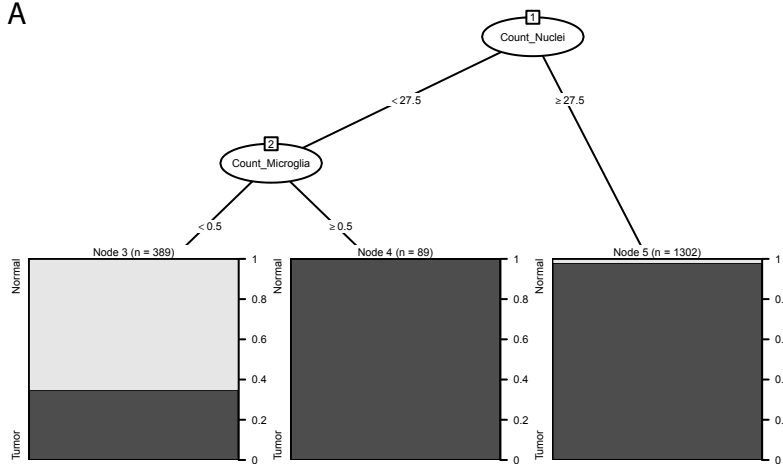

B

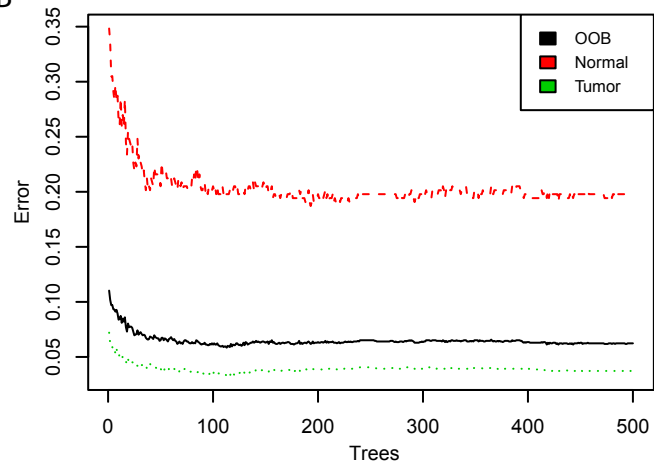

C

Importance of image features for SRH random forest machine learning model 1 (normal vs. lesional)

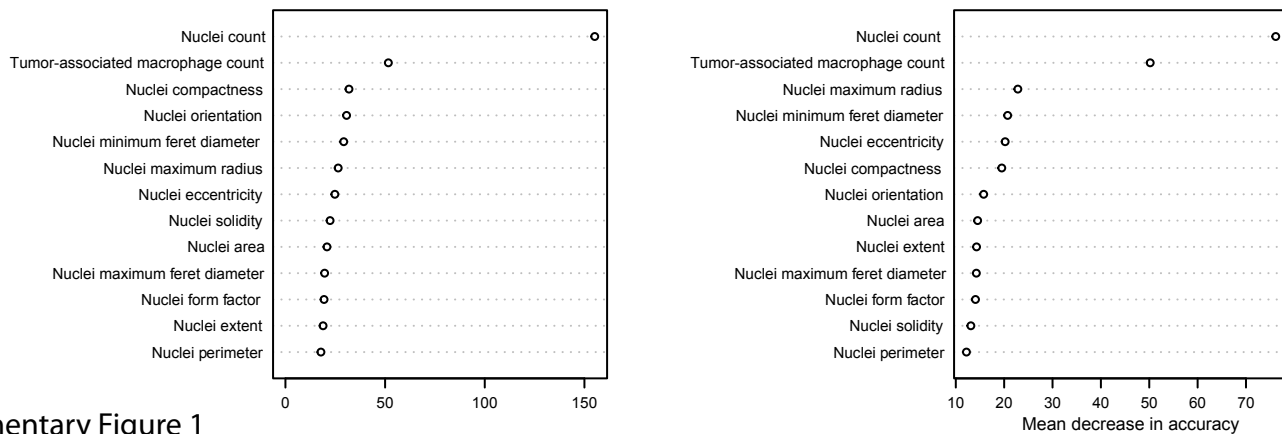

Supplement: NIHMS917783-supplement-1.pdf [file NIHMS917783-supplement-1.pdf]
