# Supplementary material
Source: PubMed Central journal article supplement (PMC5844703)

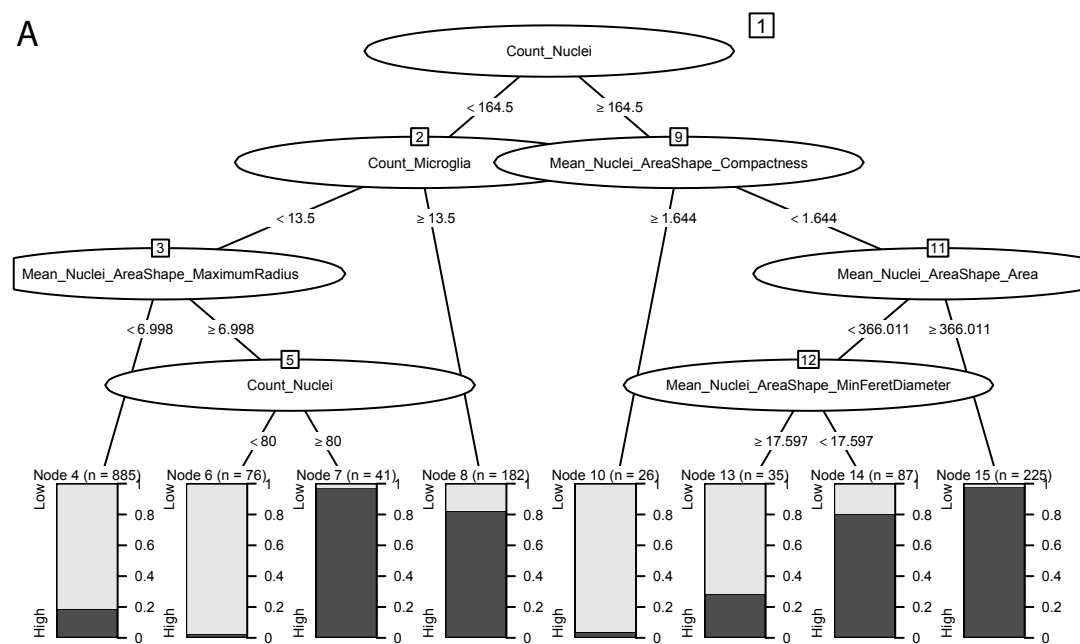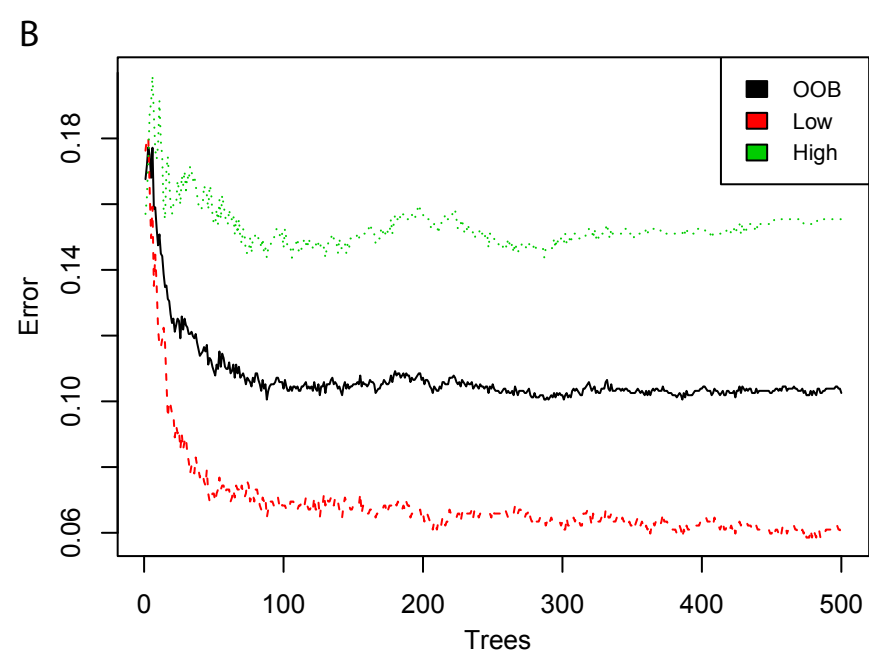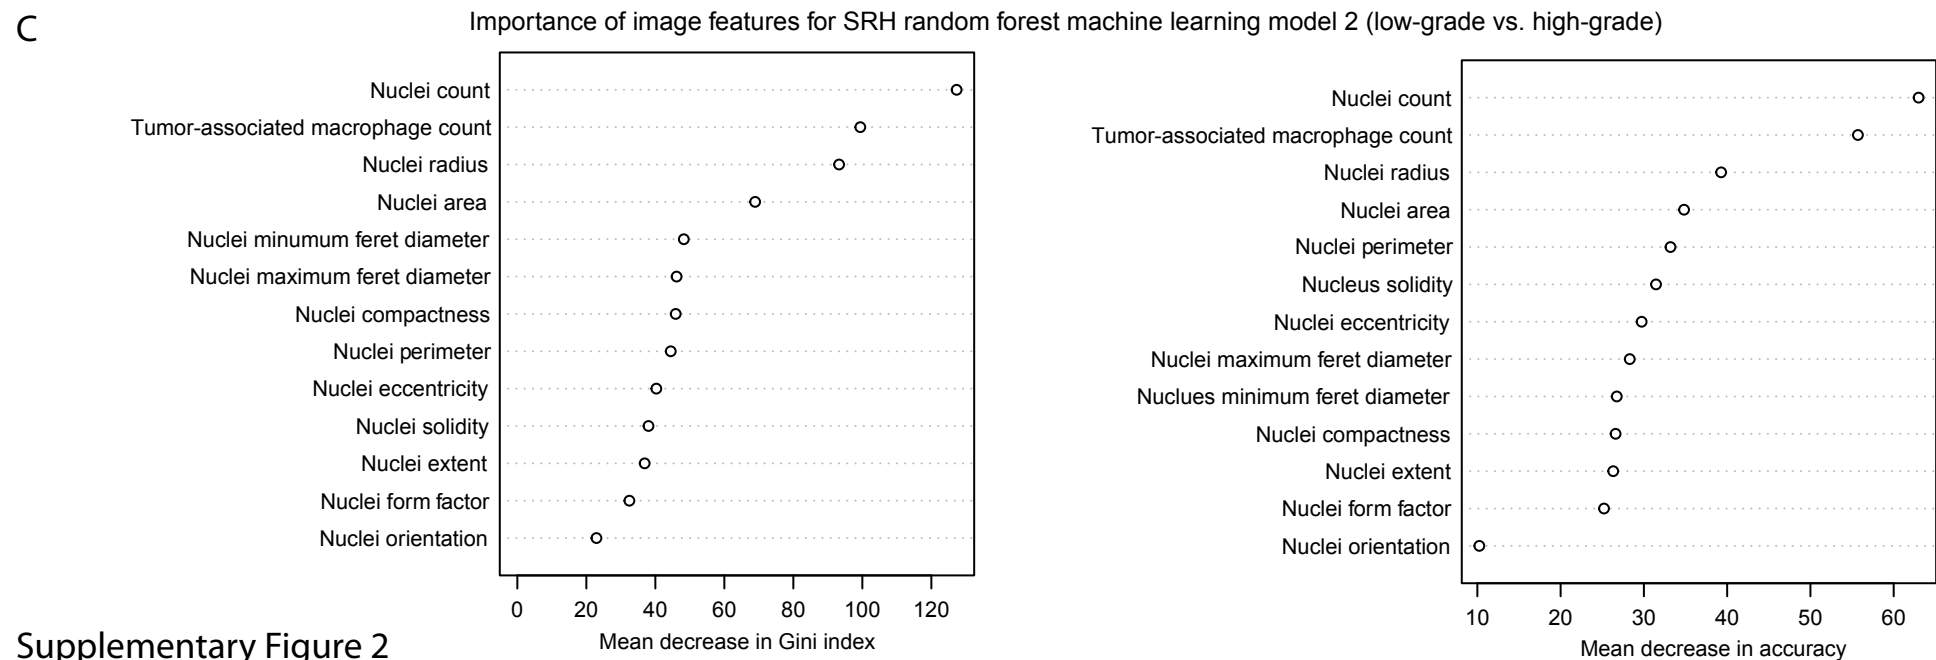

Supplement: NIHMS917783-supplement-2.pdf [file NIHMS917783-supplement-2.pdf]
